# Supplementary material for: Learning the structure of the world: The adaptive nature of state-space and action representations in multi-stage decision-making
Source: PubMed Central journal article supplement (PMC6750884; doi:10.1371/journal.pcbi.1007334), 2019-09-06
Supplement: pcbi.1007334.s003.pdf [file pcbi.1007334.s003.pdf]

**Table S1.** For the best model in each family, the table represents the negative log-model evidence ( $-\log P(D|M)$ ) for each model, the number of free parameters of each model (df), the free parameters of each model, and the family of each model. The table also represents a pseudo-r statistic ( $p-r^2$ ), which is a normalized measure of the variance accounted for in comparison to a model with random choices (averaged over subjects). ‘\*’ indicated the model with the best model evidence.

| model family | free-parameters                          | p- $r^2$ | df | $-\log p(D M)$ |
|--------------|------------------------------------------|----------|----|----------------|
| H-MB*        | $\beta_1, \eta_1, k_2, \phi (I = 0)$     | 0.207    | 4  | 1172.357       |
| H            | $\beta_1, \eta_1, k_2, \phi, I$          | 0.207    | 5  | 1185.274       |
| MF           | $\beta_1, \beta_2, \alpha_1, \lambda$    | 0.175    | 4  | 1219.87        |
| MB           | $\beta_1, \beta_2, \eta, k$              | 0.175    | 4  | 1222.57        |
| MB-MF        | $\beta_1, \beta_2, \alpha_1, \lambda, w$ | 0.180    | 5  | 1223.515       |
| H-MF         | $\beta_1, \alpha_1, k_2, \phi$           | 0.204    | 4  | 1179.717       |
| H-MB-MF      | $\beta_1, \alpha_1, w, \phi, k_2$        | 0.211    | 5  | 1178.339       |
