# Supplementary material for: Learning the structure of the world: The adaptive nature of state-space and action representations in multi-stage decision-making
Source: PubMed Central journal article supplement (PMC6750884; doi:10.1371/journal.pcbi.1007334), 2019-09-06
Supplement: pcbi.1007334.s004.pdf [file pcbi.1007334.s004.pdf]

**Table S2.** Value of the estimated parameters for each subject.

| subject | df | $p-r^2$ | no. choices | $-\log p(D M, \Theta^{\text{ML}})$ | $\beta_1$ | $\eta_1$ | $\phi$ | $k_2$ |
|---------|----|---------|-------------|------------------------------------|-----------|----------|--------|-------|
| 0       | 4  | 0.255   | 244         | 128.08                             | 1.9594    | 0.832    | 1.265  | 0.662 |
| 1       | 4  | 0.303   | 214         | 105.000                            | 2.082     | 0.717    | 2.444  | 0.808 |
| 2       | 4  | 0.1833  | 264         | 150.594                            | 1.632     | 0.755    | 2.130  | 0.670 |
| 3       | 4  | 0.317   | 206         | 98.936                             | 1.902     | 0.748    | 2.607  | 0.650 |
| 4       | 4  | 0.064   | 286         | 188.287                            | 0.972     | 0.756    | 1.916  | 0.460 |
| 5       | 4  | 0.197   | 272         | 152.832                            | 1.597     | 0.667    | 2.310  | 0.653 |
| 6       | 4  | 0.190   | 296         | 168.495                            | 1.376     | 0.821    | 2.300  | 0.931 |
| 7       | 4  | 0.151   | 252         | 149.657                            | 1.258     | 0.772    | 2.219  | 0.616 |
