# Supplementary material for: Learning the structure of the world: The adaptive nature of state-space and action representations in multi-stage decision-making
Source: PubMed Central journal article supplement (PMC6750884; doi:10.1371/journal.pcbi.1007334), 2019-09-06
Supplement: pcbi.1007334.s005.pdf [file pcbi.1007334.s005.pdf]

**Table S3.** Total number of trials in the experiment reported in the main paper.

| session | mean (SD)     |
|---------|---------------|
| probe 1 | 142.75(20.81) |
| probe 2 | 157.25(44.85) |
| probe 3 | 136.5(18.45)  |
