# Supplementary material for: Learning the structure of the world: The adaptive nature of state-space and action representations in multi-stage decision-making
Source: PubMed Central journal article supplement (PMC6750884; doi:10.1371/journal.pcbi.1007334), 2019-09-06
Supplement: pcbi.1007334.s006.pdf [file pcbi.1007334.s006.pdf]

**Table S4.** Results of the logistic regression analysis of stage 1 and stage 2 choices for the experiment reported in the main paper. For the stage 1 choices, the analysis is focused on staying on the same stage 1 action on the next trial, based on whether the previous trial was rewarded (reward), and whether the previous trial was common or rare (transition). ‘reward:transition’ is the interaction between reward, and transition type, and ‘intercept’ refers to the intercept term. For stage 2 choices, the analysis is focused on staying on the same stage 2 action, based on staying on the same stage 1 action (stay) and earning a reward in the previous trial (reward). ‘reward:stay’ is the interaction between ‘reward’, and ‘stay’. ‘probe 3’ are the results reported in the main paper.

| Stage 1 actions   |                 |                |                |                |
|-------------------|-----------------|----------------|----------------|----------------|
|                   |                 | probe 1        | probe 2        | probe 3        |
| intercept         | <i>p</i> -value | 0.618          | 0.054          | 0.373          |
|                   | $\beta$ (SE)    | -0.065 (0.131) | 0.299 (0.155)  | -0.166 (0.186) |
| reward            | <i>p</i> -value | 0.002          | <1e-4          | 0.003          |
|                   | $\beta$ (SE)    | 0.52 (0.174)   | 0.504 (0.128)  | 0.612 (0.208)  |
| transition        | <i>p</i> -value | 0.832          | 0.155          | 0.164          |
|                   | $\beta$ (SE)    | -0.057 (0.273) | -0.406 (0.285) | 0.371 (0.267)  |
| reward:transition | <i>p</i> -value | 0.005          | 0.02           | <1e-5          |
|                   | $\beta$ (SE)    | 0.842 (0.3)    | 0.399 (0.171)  | 0.923 (0.204)  |
| Stage 2 actions   |                 |                |                |                |
|                   |                 | probe 1        | probe 2        | probe 3        |
| intercept         | <i>p</i> -value | 0.221          | 0.576          | 0.001          |
|                   | $\beta$ (SE)    | -0.266 (0.217) | -0.168 (0.301) | -0.95 (0.295)  |
| reward            | <i>p</i> -value | <1e-4          | <1e-5          | <0.001         |
|                   | $\beta$ (SE)    | 0.631 (0.149)  | 1.244 (0.265)  | 0.849 (0.235)  |
| stay              | <i>p</i> -value | 0.111          | 0.255          | 0.019          |
|                   | $\beta$ (SE)    | 0.254 (0.159)  | 0.234 (0.205)  | 0.608 (0.259)  |
| reward:stay       | <i>p</i> -value | 0.222          | 0.153          | 0.027          |
|                   | $\beta$ (SE)    | 0.182 (0.149)  | 0.29 (0.203)   | 0.494 (0.224)  |
