# Supplementary material for: Learning the structure of the world: The adaptive nature of state-space and action representations in multi-stage decision-making
Source: PubMed Central journal article supplement (PMC6750884; doi:10.1371/journal.pcbi.1007334), 2019-09-06
Supplement: pcbi.1007334.s008.pdf [file pcbi.1007334.s008.pdf]

**Table S6.** Results of the logistic regression analysis of stage 1, and stage 2 choices in supplementary experiment 1. For the stage 1 choices, the analysis is focused on staying on the same stage 1 action on the next trial based on whether the previous trial was rewarded (reward) and whether the previous trial was common or rare (transition). ‘reward:transition’ is the interaction between reward, and transition type. For stage 2 choices, the analysis focuses on staying on the same stage 2 action, based on staying on the same stage 1 action (stay), and earning a reward on the previous trial (reward). ‘reward:stay’ is the interaction between ‘reward’, and ‘stay’. ‘ $p$ ’ refers to  $p$ -value. For the last probe session (s94) since the pattern of choices was not stationary but changing during the session, we presented separately the analysis for the first 16 earned outcomes during the sessions (s94:1; outcomes 1:16), second 16 outcomes earned during the session (s94:2; outcomes 17:32), and third 16 outcomes earned during the session (s94:3; outcomes 33:48).

| Stage 1 actions   |         |        |        |        |         |        |        |        |        |         |        |         |
|-------------------|---------|--------|--------|--------|---------|--------|--------|--------|--------|---------|--------|---------|
| session           |         | s32    | S40    | s49    | s57     | s66    | s78    | s87    | s94    | s94:1   | s94:2  | s94:3   |
| intercept         | $p$     | 0.773  | 0.312  | 0.017  | 0.299   | 0.177  | 0.162  | 0.885  | 0.428  | 0.46    | 0.131  | 0.194   |
|                   | SE      | 0.151  | 0.11   | 0.16   | 0.124   | 0.136  | 0.11   | 0.228  | 0.127  | 0.248   | 0.263  | 0.29    |
|                   | $\beta$ | 0.043  | 0.111  | 0.382  | 0.129   | 0.184  | 0.15   | -0.032 | 0.1    | 0.183   | -0.397 | 0.377   |
| reward            | $p$     | 0.938  | 0.085  | 0.09   | 0.067   | 0.021  | 0.001  | 0.904  | <0.001 | 0.356   | 0.003  | 0.007   |
|                   | SE      | 0.133  | 0.117  | 0.133  | 0.145   | 0.117  | 0.12   | 0.204  | 0.121  | 0.207   | 0.295  | 0.234   |
|                   | $\beta$ | -0.01  | 0.202  | 0.226  | 0.265   | 0.27   | 0.39   | 0.024  | 0.465  | 0.191   | 0.854  | 0.627   |
| transition        | $p$     | 0.764  | 0.628  | 0.098  | 0.016   | 0.825  | 0.383  | 0.993  | 0.498  | 0.407   | 0.644  | 0.335   |
|                   | SE      | 0.14   | 0.105  | 0.191  | 0.119   | 0.124  | 0.13   | 0.24   | 0.14   | 0.187   | 0.296  | 0.185   |
|                   | $\beta$ | 0.042  | -0.051 | -0.315 | -0.285  | -0.027 | -0.11  | 0.002  | 0.094  | 0.155   | -0.136 | 0.178   |
| reward:transition | $p$     | 0.882  | 0.013  | 0.362  | 0.397   | 0.485  | 0.417  | <0.001 | <0.001 | 0.011   | 0.003  | 0.668   |
|                   | SE      | 0.129  | 0.113  | 0.141  | 0.129   | 0.107  | 0.09   | 0.182  | 0.114  | 0.181   | 0.29   | 0.212   |
|                   | $\beta$ | 0.019  | -0.281 | -0.129 | 0.109   | -0.075 | 0.08   | 0.623  | 0.404  | 0.459   | 0.85   | 0.091   |
| Stage 2 actions   |         |        |        |        |         |        |        |        |        |         |        |         |
| session           |         | s32    | s40    | s49    | s57     | s66    | s78    | s87    | s94    | s94:1   | s94:2  | s94:3   |
| intercept         | $p$     | <1e-7  | <1e-12 | <1e-11 | 0.963   | <1e-8  | <1e-14 | <1e-9  | <1e-16 | 0.969   | <1e-4  | 0.972   |
|                   | SE      | 0.446  | 0.411  | 0.434  | 190.44  | 0.477  | 0.35   | 0.459  | 0.293  | 195.286 | 0.577  | 514.163 |
|                   | $\beta$ | -2.449 | -2.936 | -2.996 | -8.943  | -2.848 | -2.82  | -2.969 | -2.672 | -7.546  | -2.477 | -17.949 |
| reward            | $p$     | 0.933  | 0.938  | 0.148  | 0.984   | 0.383  | 0.137  | 0.169  | 0.019  | 0.98    | 0.924  | 0.995   |
|                   | SE      | 0.327  | 0.379  | 0.459  | 190.461 | 0.433  | 0.32   | 0.459  | 0.268  | 195.285 | 0.512  | 740.305 |
|                   | $\beta$ | 0.027  | 0.029  | 0.662  | 3.825   | 0.377  | 0.48   | 0.631  | 0.626  | 5.015   | 0.049  | 4.749   |
| stay              | $p$     | 0.057  | 0.852  | 0.074  | 0.973   | 0.401  | 0.386  | 0.891  | 0.798  | 0.98    | 0.387  | 0.994   |
|                   | SE      | 0.406  | 0.522  | 0.487  | 190.44  | 0.405  | 0.33   | 0.463  | 0.278  | 195.286 | 0.507  | 665.334 |
|                   | $\beta$ | 0.771  | -0.097 | 0.868  | -6.429  | 0.339  | 0.29   | 0.063  | 0.071  | -4.891  | 0.438  | 5.35    |
| reward:stay       | $p$     | 0.105  | 0.515  | 0.957  | 0.982   | 0.089  | 0.2    | 0.443  | 0.853  | 0.984   | 0.809  | 0.994   |
|                   | SE      | 0.32   | 0.356  | 0.454  | 190.46  | 0.398  | 0.37   | 0.49   | 0.283  | 195.286 | 0.503  | 615.096 |
|                   | $\beta$ | 0.519  | 0.232  | -0.024 | 4.252   | 0.677  | 0.47   | 0.376  | -0.052 | 3.974   | -0.121 | 4.881   |
