# Supplementary material for: Learning the structure of the world: The adaptive nature of state-space and action representations in multi-stage decision-making
Source: PubMed Central journal article supplement (PMC6750884; doi:10.1371/journal.pcbi.1007334), 2019-09-06
Supplement: pcbi.1007334.s009.pdf [file pcbi.1007334.s009.pdf]

**Table S7.** Total number of trials completed by the subjects in the supplementary experiment 1.

| session | mean (SD)       |
|---------|-----------------|
| s32     | 90.000 (9.381)  |
| s40     | 91.500 (8.036)  |
| s49     | 88.625 (13.585) |
| s57     | 82.250 (13.392) |
| s66     | 86.000 (10.142) |
| s78     | 94.500 (4.957)  |
| s87     | 87.375 (8.749)  |
| s94     | 92.625 (9.486)  |
