# Supplementary material for: Learning the structure of the world: The adaptive nature of state-space and action representations in multi-stage decision-making
Source: PubMed Central journal article supplement (PMC6750884; doi:10.1371/journal.pcbi.1007334), 2019-09-06
Supplement: pcbi.1007334.s010.pdf [file pcbi.1007334.s010.pdf]

**Table S8.** Results of the logistic regression analysis of stage 1 and stage 2 choices in supplementary experiments 2 and 3. For the stage 1 choices, the analysis is focused on staying on the same stage 1 action on the next trial, based on whether the previous trial was rewarded (reward), and whether the previous trial was common or rare (transition). ‘reward:transition’ is the interaction between reward, and transition type. For stage 2 choices, the analysis is focused on staying on the same stage 2 action, based on staying on the same stage 1 action (stay) and earning a reward in the previous trial (reward). ‘reward:stay’ is the interaction between ‘reward’, and ‘stay’.

| Stage 1 actions   |                 |                            |                            |
|-------------------|-----------------|----------------------------|----------------------------|
|                   |                 | Supplementary experiment 2 | Supplementary experiment 3 |
| session           |                 | s76                        | s74                        |
| intercept         | <i>p</i> -value | <1e-8                      | 0.74                       |
|                   | $\beta$ (SE)    | 0.78 (0.134)               | -0.042 (0.128)             |
| reward            | <i>p</i> -value | <0.001                     | <1e-7                      |
|                   | $\beta$ (SE)    | 0.451 (0.132)              | 0.509 (0.094)              |
| transition        | <i>p</i> -value | 0.467                      | 0.726                      |
|                   | $\beta$ (SE)    | -0.11 (0.152)              | -0.055 (0.159)             |
| reward:transition | <i>p</i> -value | 0.19                       | 0.485                      |
|                   | $\beta$ (SE)    | 0.183 (0.14)               | 0.066 (0.095)              |
| Stage 2 actions   |                 |                            |                            |
|                   |                 | Supplementary experiment 2 | Supplementary experiment 3 |
| session           |                 | s76                        | s74                        |
| intercept         | <i>p</i> -value | <1e-13                     | <1e-15                     |
|                   | $\beta$ (SE)    | -2.611 (0.35)              | -0.863 (0.093)             |
| reward            | <i>p</i> -value | 0.145                      | 0.002                      |
|                   | $\beta$ (SE)    | 0.56 (0.384)               | 0.276 (0.091)              |
| stay              | <i>p</i> -value | 0.887                      | 0.014                      |
|                   | $\beta$ (SE)    | -0.047 (0.336)             | 0.235 (0.096)              |
| reward:stay       | <i>p</i> -value | 0.6                        | 0.44                       |
|                   | $\beta$ (SE)    | 0.182 (0.348)              | 0.065 (0.085)              |
