# Supplementary material for: Learning the structure of the world: The adaptive nature of state-space and action representations in multi-stage decision-making
Source: PubMed Central journal article supplement (PMC6750884; doi:10.1371/journal.pcbi.1007334), 2019-09-06
Supplement: pcbi.1007334.s011.pdf [file pcbi.1007334.s011.pdf]

**Table S9.** Total number of trials completed by the subjects in the supplementary experiments 2, 3

| session                    | mean (SD)    |
|----------------------------|--------------|
| Supplementary experiment 2 | 88 (10.736)  |
| Supplementary experiment 3 | 123 (13.093) |
