# Supplementary material for: Learning the structure of the world: The adaptive nature of state-space and action representations in multi-stage decision-making
Source: PubMed Central journal article supplement (PMC6750884; doi:10.1371/journal.pcbi.1007334), 2019-09-06

**Figure S3.** Log odds ratio of the probability of staying on the same stage 1 action after getting rewarded on the previous trial (for the main experiment). Each panel shows the data for each subject. Log odds ratio=0 implies an equal preference for both actions. The odds ratios are calculated using logistic regression and p-values are colour coded.

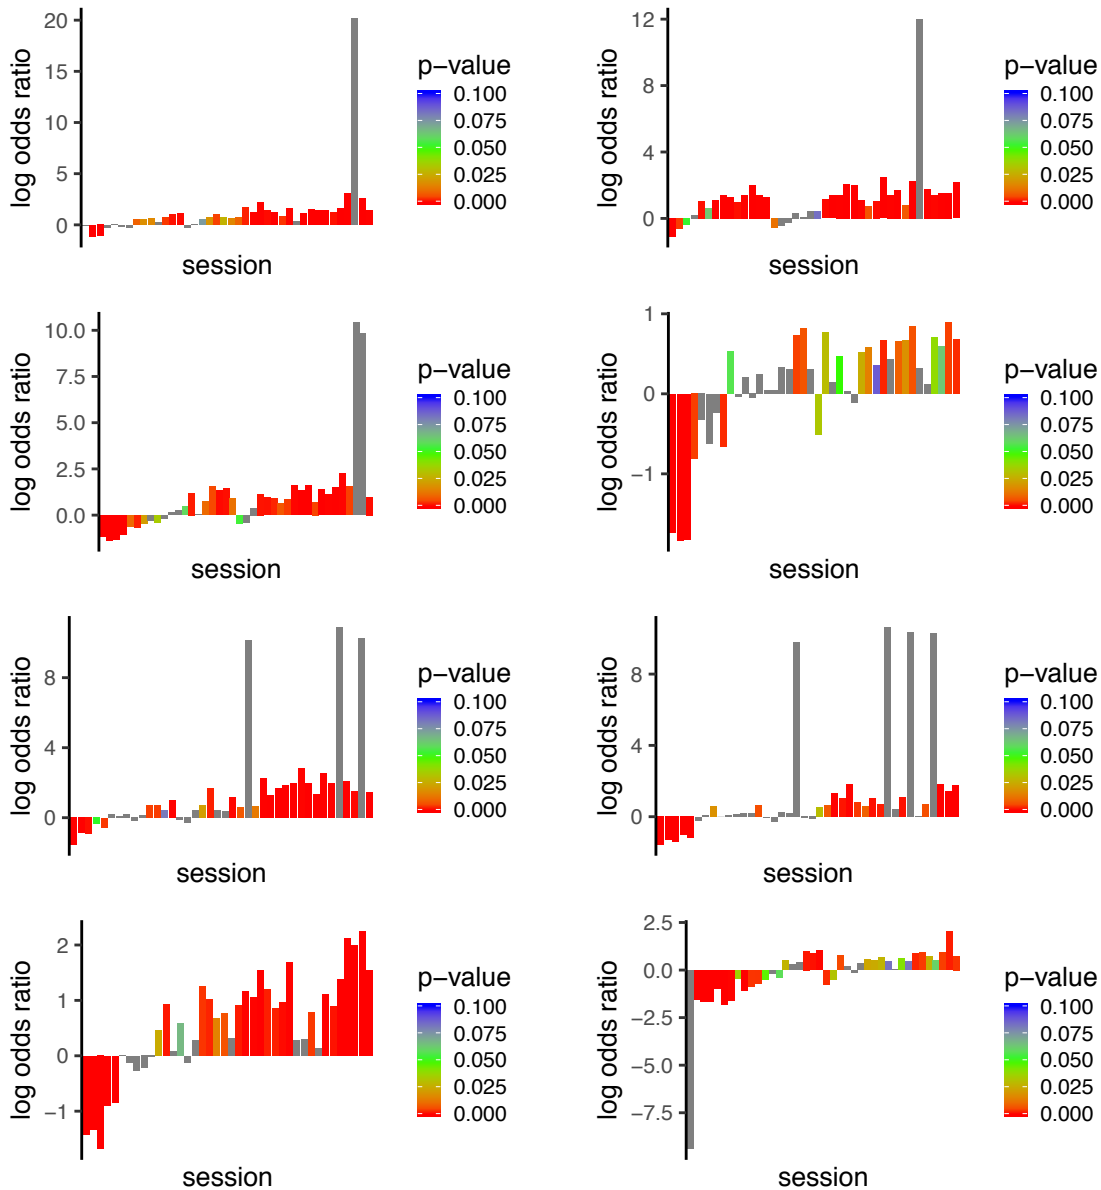

Supplement: pcbi.1007334.s014.pdf [file pcbi.1007334.s014.pdf]
