# Supplementary material for: Learning the structure of the world: The adaptive nature of state-space and action representations in multi-stage decision-making
Source: PubMed Central journal article supplement (PMC6750884; doi:10.1371/journal.pcbi.1007334), 2019-09-06

**Figure S4.** Results of discrimination training (for the experiment reported in the main paper) showing the percentage of correct responses averaged over subjects. Each point refers to a training session and error-bars are  $\pm 1$  SEM.

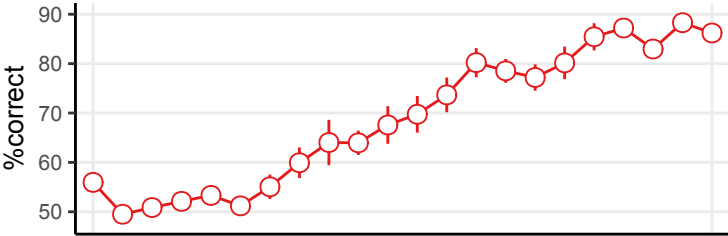

Supplement: pcbi.1007334.s015.pdf [file pcbi.1007334.s015.pdf]
