# Supplementary material for: Learning the structure of the world: The adaptive nature of state-space and action representations in multi-stage decision-making
Source: PubMed Central journal article supplement (PMC6750884; doi:10.1371/journal.pcbi.1007334), 2019-09-06

stage 2 actions (simulated)

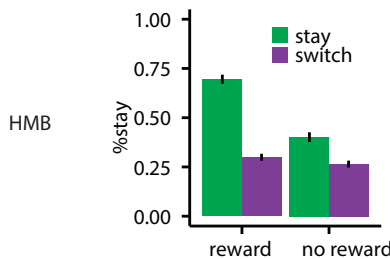

stage 1 actions (simulated)

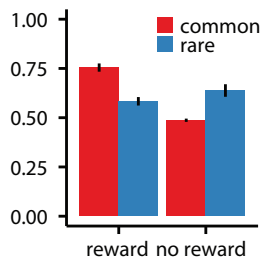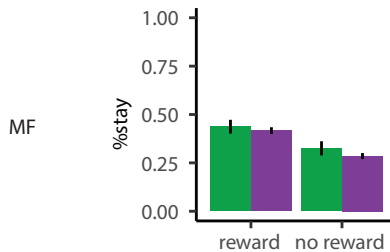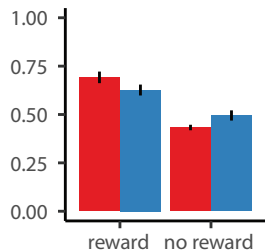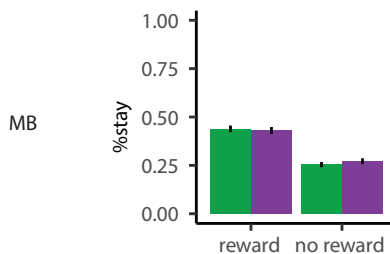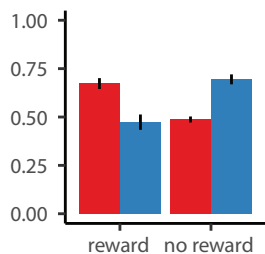

Supplement: pcbi.1007334.s019.pdf [file pcbi.1007334.s019.pdf]
